# Supplementary material for: Different Distribution Patterns of Hoverflies (Diptera: Syrphidae) and Bees (Hymenoptera: Anthophila) Along Altitudinal Gradients in Dolomiti Bellunesi National Park (Italy)
Source: MDPI journal article supplement (doi:10.3390/insects13030293), 2022-03-15
Supplement: s1 [file s1]

**Table S1.** Detailed of the three specimens identified with barcoding. The Accession Number is from GenBank where the nucleotide sequences have been deposited. For more detail about the Collection Locality see Tab. 1.

| Species                    | Sex    | Collection Locality | Date       | Altitude | Accession number |
|----------------------------|--------|---------------------|------------|----------|------------------|
| <i>Psithyrus bohemicus</i> | Female | Soladen VFB         | 13.ix.2020 | 956      | OM836488         |
| <i>Bombus wurflenii</i>    | Female | Vette Grandi VFH    | 13.ix.2020 | 2130     | OM836489         |
| <i>Bombus soroeensis</i>   | Female | Soladen VFB         | 13.ix.2020 | 956      | OM836490         |

**Table S2.** Correlation matrix between predicting variables. The table reports the P value of Sperman linear correlation. In bold the statistically significant correlation ( $P < 0.05$ ). abbreviation: Alt = Altitude; Grass = Percentage of grassland habitat; N Sp Ent = number of plant species with entomophilic pollination; N Sp Veg = number of plant species; Scree = percentage of scree area; Scrubs = percentage of scrubs habitat; Temp = temperature; Wood = Percentage of wood habitat. See text for a more detailed description of the predicting variables.

|          | Temp          | Wood   | Grass         | Scree         | Scrubs        | Slope  | N Sp Veg | N Sp Ent      |
|----------|---------------|--------|---------------|---------------|---------------|--------|----------|---------------|
| Alt      | <b>0.0000</b> | 0.2243 | 0.9235        | <b>0.0275</b> | 0.8062        | 0.0651 | 0.9368   | 0.4421        |
| Temp     |               | 0.2048 | 0.8109        | 0.1227        | 0.9136        | 0.1245 | 0.8847   | 0.7436        |
| Wood     |               |        | <b>0.0342</b> | 0.2896        | 0.8214        | 0.3049 | 0.7919   | 0.7222        |
| Grass    |               |        |               | 0.2038        | <b>0.0475</b> | 0.6612 | 0.7047   | 0.8466        |
| Scree    |               |        |               |               | 0.4246        | 0.2696 | 0.2042   | 0.8121        |
| Scrubs   |               |        |               |               |               | 0.0569 | 0.2042   | 0.0732        |
| Slope    |               |        |               |               |               |        | 0.3036   | <b>0.0305</b> |
| N Sp Veg |               |        |               |               |               |        |          | <b>0.0002</b> |

**Table S3.** List of Syrphidae species collected by pan traps, with the main ecological categories used in the analysis. Abbreviations: Fol. = Foliage; Sap. = Saprophagous; Xylosap. = Xylosaprophagous. For Adult Dimension the following categories have been used: small = 6-9 cm; medium = 9.5-12 cm, large > 12 cm.

| Species                                      | Larvae Diet  | Larvae Microhabitat | Adult Dimension |
|----------------------------------------------|--------------|---------------------|-----------------|
| <i>Brachypalpoides lentus</i> (Meigen, 1822) | Xylosap.     | Wood                | Large           |
| <i>Brachypalpus chrysites</i> Egger, 1859    | Xylosap.     | Wood                | Large           |
| <i>Cheilosia aerea</i> Dufour, 1848          | Phytophagous | Herb, Root          | Small           |
| <i>Cheilosia canicularis</i> (Panzer, 1801)  | Phytophagous | Herb, Root          | Large           |
| <i>Cheilosia carbonaria</i> Egger, 1860      | Phytophagous | Herb, Root          | Medium          |
| <i>Cheilosia derasa</i> Loew, 1857           | Phytophagous | Herb, Root          | Small           |
| <i>Cheilosia gagatea</i> Loew, 1857          | Phytophagous | Herb                | Medium          |
| <i>Cheilosia grisella</i> Becker, 1894       | Phytophagous | Herb, Root          | Small           |
| <i>Cheilosia illustrata</i> (Harris, 1776)   | Phytophagous | Herb, Root          | Medium          |
| <i>Cheilosia impressa</i> Loew, 1840         | Phytophagous | Herb, Root          | Small           |

|                                                 |              |                 |        |
|-------------------------------------------------|--------------|-----------------|--------|
| <i>Cheilosia laeviseta</i> Claussen, 1987       | Phytophagous | Herb, Root      | Small  |
| <i>Cheilosia laticornis</i> Rondani, 1857       | Phytophagous | Herb, Root      | Medium |
| <i>Cheilosia pagana</i> (Meigen, 1822)          | Phytophagous | Herb, Root      | Small  |
| <i>Cheilosia personata</i> Loew, 1857           | Phytophagous | Herb            | Medium |
| <i>Cheilosia rhynchops</i> Egger, 1860          | Phytophagous | Herb, Root      | Medium |
| <i>Cheilosia vernalis</i> (Fallén, 1817)        | Phytophagous | Herb, Root      | Small  |
| <i>Chrysotoxum bicinctum</i> (Linnaeus, 1758)   | Zoophagous   | Root            | Medium |
| <i>Chrysotoxum elegans</i> Loew, 1841           | Zoophagous   | Root            | Medium |
| <i>Chrysotoxum fasciatum</i> (Müller, 1764)     | Zoophagous   | Root            | Medium |
| <i>Dasysyrphus albostrigatus</i> (Fallén, 1817) | Zoophagous   | Tree Fol.       | Medium |
| <i>Epistrophe grossulariae</i> (Meigen, 1822)   | Zoophagous   | Herb            | Medium |
| <i>Episyrphus balteatus</i> (De Geer, 1776)     | Zoophagous   | Herb, Tree Fol. | Medium |
| <i>Eristalis arbustorum</i> (Linnaeus, 1758)    | Water Sap.   | Water           | Medium |
| <i>Eristalis interrupta</i> (Poda, 1761)        | Water Sap.   | Water           | Medium |
| <i>Eristalis pertinax</i> (Scopoli, 1763)       | Water Sap.   | Water           | Large  |
| <i>Eristalis similis</i> (Fallén, 1817)         | Water Sap.   | Water           | Large  |
| <i>Eristalis tenax</i> (Linnaeus, 1758)         | Water Sap.   | Water           | Large  |
| <i>Eumerus alpinus</i> Rondani, 1857            | Phytophagous | Herb, Root      | Medium |
| <i>Eumerus ornatus</i> Meigen, 1822             | Phytophagous | Herb, Root      | Small  |
| <i>Eumerus sinuatus</i> Loew, 1855              | Phytophagous | Herb, Root      | Medium |
| <i>Eupeodes corollae</i> (Fabricius, 1794)      | Zoophagous   | Tree Fol.       | Small  |
| <i>Eupeodes lapponicus</i> (Zetterstedt, 1838)  | Zoophagous   | Tree Fol.       | Medium |
| <i>Eupeodes luniger</i> (Meigen, 1822)          | Zoophagous   | Tree Fol.       | Medium |
| <i>Ferdinandea cuprea</i> (Scopoli, 1763)       | Xylosap.     | Wood            | Medium |
| <i>Melanostoma mellinum</i> (Linnaeus, 1758)    | Zoophagous   | Herb, Root      | Small  |
| <i>Meliscaeva auricollis</i> (Meigen, 1822)     | Zoophagous   | Tree Fol.       | Medium |
| <i>Meliscaeva cinctella</i> (Zetterstedt, 1843) | Zoophagous   | Herb, Root      | Medium |
| <i>Merodon aeneus</i> Meigen, 1822              | Phytophagous | Herb, Root      | Small  |
| <i>Merodon armipes</i> Rondani, 1843            | Phytophagous | Herb, Root      | Medium |
| <i>Merodon cinereus</i> (Fabricius, 1794)       | Phytophagous | Herb, Root      | Medium |
| <i>Merodon constans</i> (Rossi, 1794)           | Phytophagous | Herb, Root      | Medium |
| <i>Merodon equestris</i> (Fabricius, 1794)      | Phytophagous | Herb, Root      | Large  |
| <i>Merodon rufus</i> Meigen, 1838               | Phytophagous | Herb, Root      | Medium |
| <i>Microdon devius</i> (Linnaeus, 1761)         | Zoophagous   | Root            | Medium |
| <i>Myathropea florea</i> (Linnaeus, 1758)       | Water Sap.   | Water           | Large  |
| <i>Paragus pecchiolii</i> Rondani, 1857         | Zoophagous   | Herb            | Small  |
| <i>Pipiza noctiluca</i> (Linnaeus, 1758)        | Zoophagous   | Herb            | Small  |
| <i>Platycheirus albimanus</i> (Fabricius, 1781) | Zoophagous   | Herb, Tree Fol. | Small  |
| <i>Platycheirus manicatus</i> (Meigen, 1822)    | Zoophagous   | Herb            | Small  |
| <i>Platycheirus nielsenii</i> Vockeroth, 1990   | Zoophagous   | Herb, Tree Fol. | Small  |
| <i>Platycheirus scutatus</i> (Meigen, 1822)     | Zoophagous   | Herb, Tree Fol. | Small  |
| <i>Rhingia campestris</i> Meigen, 1822          | Water Sap.   | Water           | Medium |

|                                                              |            |                    |        |
|--------------------------------------------------------------|------------|--------------------|--------|
| <i>Scaeva dignota</i> (Rondani, 1857)                        | Zoophagous | Herb, Tree<br>Fol. | Large  |
| <i>Scaeva pyrastris</i> (Linnaeus, 1758)                     | Zoophagous | Herb, Tree<br>Fol. | Large  |
| <i>Sphaerophoria fatarum</i> Goeldlin de Tiefenau, 1974      | Zoophagous | Herb               | Small  |
| <i>Sphaerophoria interrupta</i> (Fabricius, 1805)            | Zoophagous | Herb               | Small  |
| <i>Sphaerophoria scripta</i> (Linnaeus, 1758)                | Zoophagous | Herb               | Small  |
| <i>Sphaerophoria taeniata</i> (Meigen, 1822)                 | Zoophagous | Herb               | Small  |
| <i>Syrphus ribesii</i> (Linnaeus, 1758)                      | Zoophagous | Herb               | Medium |
| <i>Syrphus torvus</i> Osten-Sacken, 1875                     | Zoophagous | Herb               | Medium |
| <i>Syrphus vitripennis</i> Meigen, 1822                      | Zoophagous | Herb               | Medium |
| <i>Trichopsomyia joratensis</i> (Goeldlin de Tiefenau, 1997) | Zoophagous | Herb               | Small  |
| <i>Volucella bombylans</i> (Linnaeus, 1758)                  | Zoophagous | Root               | Large  |
| <i>Volucella pellucens</i> (Linnaeus, 1758)                  | -          | -                  | Large  |
| <i>Xylota ignava</i> (Panzer, 1798)                          | Xylosap.   | Wood               | Large  |
| <i>Xylota jakutorum</i> Bagatshanova, 1980                   | Xylosap.   | Wood               | Medium |
| <i>Xylota segnis</i> (Linnaeus, 1758)                        | Xylosap.   | Wood               | Medium |
| <i>Xylota sylvarum</i> (Linnaeus, 1758)                      | Xylosap.   | Wood               | Large  |

**Table S4.** List of Anthophila species collected by pan traps, with the main ecological categories used in the analysis. Abbreviations: Soc. = Social; Veg. = Vegetation. For Adult Dimension the following categories have been used: small = 5-10 cm; medium = 10.5-15.5 cm; large > 15.5 cm.

| <i>Specie</i>                                | <b>Family</b> | <b>Nest Position</b> | <b>Diet Breath</b> | <b>Adult Dimension</b> |
|----------------------------------------------|---------------|----------------------|--------------------|------------------------|
| <i>Andrena aeneiventris</i> Morawitz, 1872   | Andrenidae    | Soil                 | Oligolectic        | Small                  |
| <i>Andrena bicolor</i> Fabricius, 1775       | Andrenidae    | Soil                 | Polilectic         | Small                  |
| <i>Andrena cinerea</i> Brullé, 1832          | Andrenidae    | Soil                 | Polilectic         | Small                  |
| <i>Andrena dorsata</i> (Kirby, 1802)         | Andrenidae    | Soil                 | Polilectic         | Small                  |
| <i>Andrena fulvago</i> (Christ, 1791)        | Andrenidae    | Soil                 | Polilectic         | Medium                 |
| <i>Andrena hattorfiana</i> (Fabricius, 1775) | Andrenidae    | Soil                 | Oligolectis        | Medium                 |
| <i>Andrena nana</i> (Kirby, 1802)            | Andrenidae    | Soil                 | Polilectic         | Small                  |
| <i>Andrena ovatula</i> (Kirby, 1802)         | Andrenidae    | Soil                 | Polilectic         | Small                  |
| <i>Andrena similis</i> Smith, 1849           | Andrenidae    | Soil                 | Oligolectic        | Medium                 |
| <i>Andrena ventralis</i> Imhoff, 1832        | Andrenidae    | Soil                 | Oligolectic        | Small                  |
| <i>Andrena vulpecula</i> Kriechbaumer, 1873  | Andrenidae    | Soil                 | Oligolectic        | Small                  |
| <i>Andrena wilkella</i> (Kirby, 1802)        | Andrenidae    | Soil                 | Oligolectic        | Medium                 |
| <i>Apis mellifera</i> Linnaeus, 1758         | Apidae        | -                    | Polilectic         | Medium                 |
| <i>Bombus hortorum</i> (Linnaeus, 1761)      | Apidae        | Soil                 | Polilectic         | Medium                 |
| <i>Bombus inexpectatus</i> (Tkalcú, 1963)    | Apidae        | Soil                 | Soc.<br>Parasite   | Large                  |
| <i>Bombus jonellus</i> (Kirby, 1802)         | Apidae        | Soil                 | Oligolectic        | Medium                 |
| <i>Bombus lapidarius</i> (Linnaeus, 1758)    | Apidae        | Soil                 | Polilectic         | Medium                 |
| <i>Bombus lucorum</i> (Linnaeus, 1761)       | Apidae        | Soil                 | Polilectic         | Large                  |
| <i>Bombus pascuorum</i> (Scopoli, 1763)      | Apidae        | Soil                 | Polilectic         | Medium                 |

|                                                    |              |                |                  |        |
|----------------------------------------------------|--------------|----------------|------------------|--------|
| <i>Bombus pratorum</i> (Linnaeus, 1761)            | Apidae       | Soil           | Polilectic       | Medium |
| <i>Bombus ruderarius</i> (Müller, 1776)            | Apidae       | Soil           | Polilectic       | Large  |
| <i>Bombus soroeensis</i> (Fabricius, 1776)         | Apidae       | Soil           | Soc.<br>Parasite | Medium |
| <i>Bombus</i> sp 2                                 | Apidae       | -              | -                | -      |
| <i>Bombus terrestris</i> (Linnaeus, 1758)          | Apidae       | Soil           | Polilectic       | Medium |
| <i>Bombus wurfleini</i> Radoszkowski, 1859         | Apidae       | Soil           | Polilectic       | Medium |
| <i>Eucera nigrifacies</i> Lepeletier, 1841         | Apidae       | Veg.           | Polilectic       | Medium |
| <i>Halictus sajo</i> Blüthgen, 1923                | Halictidae   | Soil           | Polilectic       | Small  |
| <i>Halictus scabiosae</i> (Rossi, 1790)            | Halictidae   | Soil           | Polilectic       | Medium |
| <i>Halictus sexcintus</i> (Fabricius, 1775)        | Halictidae   | Soil           | Polilectic       | Medium |
| <i>Halictus tumulorum</i> (Linnaeus, 1758)         | Halictidae   | Soil           | Polilectic       | Small  |
| <i>Hoplitis claviventris</i> (Thompson, 1872)      | Megachilidae | Veg.           | Polilectic       | Small  |
| <i>Hylaeus brevicornis</i> Nylander, 1852          | Colletidae   | Veg.           | Polilectic       | Small  |
| <i>Hylaeus communis</i> Nylander, 1852             | Colletidae   | Veg.           | Polilectic       | Small  |
| <i>Hylaeus glacialis</i> Morawitz, 1872            | Colletidae   | Veg.           | -                | Small  |
| <i>Hylaeus hyalinatus</i> Smith, 1842              | Colletidae   | Holes          | Polilectic       | Small  |
| <i>Lasioglossum albipes</i> (Fabricius, 1781)      | Halictidae   | Soil           | Polilectic       | Small  |
| <i>Lasioglossum calceatum</i> (Scopoli, 1763)      | Halictidae   | Soil           | Polilectic       | Small  |
| <i>Lasioglossum fulvicorne</i> (Kirby, 1802)       | Halictidae   | Soil           | Polilectic       | Small  |
| <i>Lasioglossum laevigatum</i> (Kirby, 1802)       | Halictidae   | Soil           | Polilectic       | Small  |
| <i>Lasioglossum laticeps</i> (Schenck, 1868)       | Halictidae   | Soil           | Polilectic       | Small  |
| <i>Lasioglossum malachurum</i> (Kirby, 1802)       | Halictidae   | Soil           | Polilectic       | Small  |
| <i>Lasioglossum nitidulum</i> (Fabricius, 1804)    | Halictidae   | Soil           | Polilectic       | Small  |
| <i>Lasioglossum pauxillum</i> (Schenck, 1853)      | Halictidae   | Soil           | Polilectic       | Small  |
| <i>Lasioglossum punctatissimum</i> (Schenck, 1853) | Halictidae   | Soil           | Polilectic       | Small  |
| <i>Lasioglossum subhirtum</i> (Lepeletier, 1841)   | Halictidae   | Soil           | Polilectic       | Small  |
| <i>Lasioglossum truncaticolle</i> (Morawitz, 1877) | Halictidae   | -              | -                | -      |
| <i>Lasioglossum villosulum</i> (Kirby, 1802)       | Halictidae   | Soil           | Polilectic       | Small  |
| <i>Lasioglossum zonulum</i> (Smith, 1848)          | Halictidae   | Soil           | Polilectic       | Small  |
| <i>Megachile circumcincta</i> Kirby, 1802          | Megachilidae | Soil,<br>Veg.  | Polilectic       | Medium |
| <i>Megachile lagopoda</i> (Linnaeus, 1761)         | Megachilidae | Soil           | Polilectic       | Medium |
| <i>Megachile pilicrus</i> Morawitz, 1877           | Megachilidae | Soil           | Polilectic       | Medium |
| <i>Nomada alboguttata</i> Herrich-Schäffer, 1839   | Apidae       | Soil           | Soc.<br>Parasite | Small  |
| <i>Osmia aurulenta</i> Panzer, 1799                | Megachilidae | Soil,<br>Holes | Polilectic       | Medium |
| <i>Osmia bicolor</i> (Schrank, 1781)               | Megachilidae | Holes          | Polilectic       | Small  |
| <i>Osmia caerulea</i> (Linnaeus, 1758)             | Megachilidae | Veg.,<br>Holes | Polilectic       | Small  |
| <i>Osmia cerinthidis</i> Morawitz, 1876            | Megachilidae | Soil           | Oligolectic      | Medium |
| <i>Osmia emarginata</i> Lepeletier, 1841           | Megachilidae | Holes          | Polilectic       | Medium |
| <i>Osmia leaiana</i> (Kirby, 1802)                 | Megachilidae | Veg.,<br>Holes | Oligolectic      | Small  |

|                                                     |              |       |                  |        |
|-----------------------------------------------------|--------------|-------|------------------|--------|
| <i>Osmia mustelina</i> Gerstaecker, 1869            | Megachilidae | Holes | Poligolectic     | Small  |
| <i>Psithyrus campestris</i> (Panzer, 1801)          | Apidae       | Soil  | Soc.<br>Parasite | Large  |
| <i>Psithyrus</i> cfr <i>bohemicus</i> (Seidl, 1838) | Apidae       | Soil  | Soc.<br>Parasite | Large  |
| <i>Psithyrus maxillosus</i> (Klug, 1817)            | Apidae       | Soil  | Soc.<br>Parasite | Large  |
| <i>Psithyrus rupestris</i> (Fabricius, 1793)        | Apidae       | Soil  | Soc.<br>Parasite | Large  |
| <i>Psithyrus sylvestris</i> (Lepeletier, 1832)      | Apidae       | Soil  | Soc.<br>Parasite | Medium |
| <i>Psithyrus vestalis</i> (Geoffroy, 1785)          | Apidae       | Soil  | Soc.<br>Parasite | Large  |
| <i>Tetraloniella salicariae</i> (Lepeletier, 1841)  | Apidae       | Veg.  | Oligolectic      | Small  |
| <i>Xylocopa violacea</i> (Linnaeus, 1758)           | Apidae       | Veg.  | Polilectic       | Large  |
